# Supplementary material for: A Lateral Flow Immunoassay for the Rapid Identification of CTX-M-Producing Enterobacterales from Culture Plates and Positive Blood Cultures
Source: PubMed Central journal article supplement (PMC7600033; doi:10.3390/diagnostics10100764), 2020-09-28
Supplement: diagnostics-10-00764-s001.pdf [file diagnostics-10-00764-s001.pdf]

1  
2  
3  
4  
5  
6  
7  
8  
9  
10  
11  
12  
13  
14  
15  
16  
17  
18  
19  
20

**A lateral flow immunoassay for the rapid identification of CTX-M-producing Enterobacterales**

Sandrine BERNABEU<sup>1,2</sup>, Kayaththiry C. RATNAM,<sup>2</sup> Camille GONZALEZ,<sup>2</sup> Hervé BOUTAL<sup>3</sup>, Anaïs VOGEL<sup>3</sup>, Karine DEVILLIERS<sup>3</sup>, Marc PLAISANCE<sup>3</sup>, Saoussen OUESLATI<sup>1,2</sup>, Surbhi MALHOTRA-KUMAR<sup>4,5</sup>, Laurent DORTET<sup>1,2,6</sup>, Stéphanie SIMON<sup>3</sup>, Hervé VOLLAND<sup>3</sup>, Thierry NAAS<sup>1,2,6\*</sup>

<sup>1</sup> Team Resist, UMR1184, Université Paris-Saclay - INSERM - CEA, LabEx Lermite,

<sup>2</sup> Bacteriology-Hygiene unit, APHP, Hôpital Bicêtre, Le Kremlin-Bicêtre, France

<sup>3</sup> Service de Pharmacologie et Immunoanalyse (SPI), CEA, INRA, Laboratoire d'Etudes et de Recherches en Immunanalyse, Université Paris-Saclay, F-91191, Gif-sur-Yvette, France

<sup>4</sup> Laboratory of Medical Microbiology, Vaccine & Infectious Disease. Institute, University of Antwerp, Antwerp, Belgium

<sup>5</sup> Members of ESCMID Study Group for Antimicrobial Resistance Surveillance - ESGARS

<sup>6</sup> Associated French National Reference Center for Antibiotic Resistance: Carbapenemase-producing Enterobacteriaceae, Le Kremlin-Bicêtre, France

*Supplemental tables 3*

21 Table S1: Retrospective evaluation of NG-Test MULTI on well characterized isolates

| $\beta$ -lactamase content | CTX-M group <sup>a</sup> | Species              | No. of isolates | NG-Test CTX-M Multi  |
|----------------------------|--------------------------|----------------------|-----------------|----------------------|
| CTX-M-1                    | 1                        | <i>C. freundii</i>   | 1               | <b>P</b>             |
| CTX-M-1                    | 1                        | <i>C. koseri</i>     | 1               | <b>P</b>             |
| CTX-M-1                    | 1                        | <i>E. coli</i>       | 2               | <b>P</b>             |
| CTX-M-1 + TEM-1            | 1                        | <i>E. coli</i>       | 1               | <b>P</b>             |
| CTX-M-10                   | 1                        | <i>E. coli</i>       | 1               | <b>P</b>             |
| CTX-M-101                  | 1                        | <i>E. coli</i>       | 1               | <b>P</b>             |
| CTX-M-15                   | 1                        | <i>E. coli</i>       | 1               | <b>P</b>             |
| CTX-M-15                   | 1                        | <i>K. oxytoca</i>    | 1               | <b>P</b>             |
| CTX-M-15                   | 1                        | <i>K. pneumoniae</i> | 1               | <b>P*</b>            |
| CTX-M-15 + SHV-27          | 1                        | <i>K. pneumoniae</i> | 1               | <b>P</b>             |
| CTX-M-15 + TEM-1           | 1                        | <i>C. freundii</i>   | 1               | <b>P</b>             |
| CTX-M-15 + TEM-1           | 1                        | <i>E. coli</i>       | 1               | <b>P</b>             |
| CTX-M-15 + TEM-1           | 1                        | <i>K. oxytoca</i>    | 1               | <b>P</b>             |
| CTX-M-15 + TEM-1           | 1                        | <i>M. morgani</i>    | 1               | <b>P</b>             |
| CTX-M-15 + TEM-1           | 1                        | <i>P. mirabilis</i>  | 1               | <b>P</b>             |
| CTX-M-15 + TEM-1 + SHV-11  | 1                        | <i>E. cloacae</i>    | 2               | <b>P</b>             |
| CTX-M-15 + TEM-1 + SHV-12  | 1                        | <i>E. cloacae</i>    | 1               | <b>P</b>             |
| CTX-M-15 + TEM-1 + SHV-28  | 1                        | <i>C. freundii</i>   | 1               | <b>P<sup>#</sup></b> |
| CTX-M-182                  | 1                        | <i>E. coli</i>       | 1               | <b>P</b>             |
| CTX-M-3 + TEM-1            | 1                        | <i>E. coli</i>       | 1               | <b>P</b>             |
| CTX-M-3 + TEM-1 + SHV-11   | 1                        | <i>K. pneumoniae</i> | 1               | <b>P</b>             |
| CTX-M-32 + TEM-1           | 1                        | <i>E. coli</i>       | 1               | <b>P</b>             |
| CTX-M-37                   | 1                        | <i>E. coli</i>       | 1               | <b>P</b>             |
| CTX-M-55                   | 1                        | <i>E. coli</i>       | 2               | <b>P</b>             |
| CTX-M-57                   | 1                        | <i>E. coli</i>       | 1               | <b>P</b>             |
| CTX-M-71                   | 1                        | <i>E. coli</i>       | 1               | <b>P</b>             |
| CTX-M-71                   | 1                        | <i>P. mirabilis</i>  | 1               | <b>P</b>             |
| CTX-M-82                   | 1                        | <i>E. coli</i>       | 1               | <b>P</b>             |
| CTX-M-127                  | 1                        | <i>K. pneumoniae</i> | 1               | <b>P</b>             |
| CTX-M-2 + TEM-1            | 2                        | <i>E. coli</i>       | 1               | <b>P</b>             |
| CTX-M-2 + TEM-1 + OKP6     | 2                        | <i>K. pneumoniae</i> | 1               | <b>P</b>             |
| CTX-M-100                  | 25                       | <i>E. coli</i>       | 1               | <b>P</b>             |
| CTX-M-94                   | 25                       | <i>E. coli</i>       | 1               | <b>P</b>             |
| CTX-M-8                    | 8                        | <i>E. coli</i>       | 1               | <b>P</b>             |
| CTX-M-8 + TEM-1 + SHV-28   | 8                        | <i>K. pneumoniae</i> | 1               | <b>P<sup>#</sup></b> |
| CTX-M-13                   | 9                        | <i>E. coli</i>       | 1               | <b>P</b>             |
| CTX-M-14 + TEM-1           | 9                        | <i>E. coli</i>       | 3               | <b>P</b>             |
| CTX-M-17                   | 9                        | <i>E. coli</i>       | 1               | <b>P</b>             |
| CTX-M-18                   | 9                        | <i>K. pneumoniae</i> | 1               | <b>P<sup>#</sup></b> |
| CTX-M-19                   | 9                        | <i>K. pneumoniae</i> | 1               | <b>P</b>             |

|                |   |                      |   |          |
|----------------|---|----------------------|---|----------|
| CTX-M-24       | 9 | <i>E. coli</i>       | 1 | <b>P</b> |
| CTX-M-27       | 9 | <i>E. coli</i>       | 2 | <b>P</b> |
| CTX-M-65       | 9 | <i>E. coli</i>       | 1 | <b>P</b> |
| CTX-M-9        | 9 | <i>E. cloacae</i>    | 1 | <b>P</b> |
| CTX-M-93       | 9 | <i>E. coli</i>       | 1 | <b>P</b> |
| SHV-12         | x | <i>E. coli</i>       | 1 | N        |
| SHV-12 + TEM-1 | x | <i>K. oxytoca</i>    | 1 | N        |
| SHV-12 + TEM-1 | x | <i>C. freundii</i>   | 1 | N        |
| SHV-28 + TEM-3 | x | <i>K. pneumoniae</i> | 1 | N        |
| SHV-2a         | x | <i>E. coli</i>       | 1 | N        |
| SHV-2a         | x | <i>K. pneumoniae</i> | 1 | N        |
| TEM-24         | x | <i>K. aerogenes</i>  | 2 | N        |
| TEM-3          | x | <i>E. coli</i>       | 1 | N        |
| TEM-3          | x | <i>E. cloacae</i>    | 1 | N        |
| TEM-52         | x | <i>E. coli</i>       | 1 | N        |
| TEM-52 + TEM-1 | x | <i>P. mirabilis</i>  | 1 | N        |
| VEB-1          | x | <i>E. cloacae</i>    | 1 | N        |

22 P, positive result; N, negative result

23 # Invalid result at the first attempt and detected as positive with a modified protocol

24 <sup>a</sup>1, CTX-M-1 group; 2, CTX-M-2 group; 8, CTX-M-8 group; 9, CTX-M-9 group; 25, CTX-M-25 group

25

26 Table S2: Retrospective evaluation of NG-Test MULTI on *K. oxytoca* isolates

| isolate # | Reference | Main acquired $\beta$ -lactamase content | NG-Test CTX-M Multi |
|-----------|-----------|------------------------------------------|---------------------|
| 1         | R8J10     | NDM-1                                    | N                   |
| 2         | R13E1     | GES-7                                    | N                   |
| 3         | O53G7     | CMY-2                                    | N                   |
| 4         | O60J4     | OXA-48                                   | N                   |
| 5         | O61I8     | OXA-48 + VIM-1                           | N                   |
| 6         | 230C9     | OXA-48                                   | N                   |
| 7         | 230C10    | OXA-48                                   | N                   |
| 8         | 232E1-    | OXA-48+ CTX-M-15                         | <b>P</b>            |
| 9         | 232F7     | OXA-48                                   | N                   |
| 10        | 233F2     | VIM-1                                    | N                   |
| 11        | 234C3     | VIM-1                                    | N                   |
| 12        | 235E9-    | DHA-1                                    | N                   |
| 13        | 237F6     | OXA-48 + VIM-1+ CTX-M-15                 | <b>P</b>            |
| 14        | 243J9     | NDM-1                                    | N                   |
| 15        | B5R10     | NDM-1                                    | N                   |
| 16        | 34F&      | NDM-1+ CTX-M-15                          | <b>P</b>            |
| 17        | O50H3     | VIM-1+ CTX-M-15                          | <b>P</b>            |
| 18        | 10C8      | CMY-2                                    | N                   |
| 19        | 2011-5    | TEM-1                                    | N                   |
| 20        | 2011-48   | TEM-1                                    | N                   |
| 21        | 2011-88   | TEM-1                                    | N                   |

27 P, positive result; N, negative result

28

29 Table S3: Retrospective evaluation of NG-Test MULTI on *Kluyvera* spp isolates  
 30

| Isolate # | Species                | Identifier | Main acquired $\beta$ -<br>lactamase content | NG-Test CTX Multi |
|-----------|------------------------|------------|----------------------------------------------|-------------------|
| 1         | <i>K. cryocrescens</i> | CIP7952    | None                                         | P*                |
| 2         | <i>K. ascorbata</i>    | KJ8        | PER-2                                        | N                 |
| 3         | <i>K. ascorbata</i>    | KJ68       | PER-2                                        | p*                |
| 4         | <i>K. ascorbata</i>    | CIP8295    | None                                         | p*                |
| 5         | <i>K. ascorbata</i>    | CIP7953    | None                                         | p*                |
| 6         | <i>K. cryocrescens</i> | CIP8296    | None                                         | p*                |
| 7         | <i>K. cryocrescens</i> | CIP7954    | None                                         | p*                |
| 8         | <i>K. ascorbata</i>    | Bud        | None                                         | p*                |
| 9         | <i>K. ascorbata</i>    | FL-1       | None                                         | N                 |
| 10        | <i>K. ascorbata</i>    | FL-2       | None                                         | p*                |
| 12        | <i>K. cochlae</i>      | S3/1 49T   | None                                         | N                 |
| 13        | <i>K. cochlae</i>      | S3/1 913   | None                                         | N                 |
| 14        | <i>K. cochlae</i>      | S3/1 859   | None                                         | N                 |
| 15        | <i>Kluyvera</i>        | spp1       | None                                         | N                 |
| 11        | <i>K. georgiana</i>    | O12H4      | None                                         | N                 |
| 16        | <i>K. ascorbata</i>    | O23C8      | None                                         | <b>P</b>          |
| 17        | <i>K. ascorbata</i>    | O38I1      | None                                         | p*                |
| 18        | <i>K. ascorbata</i>    | 18-276     | None                                         | N                 |
| 19        | <i>K. ascorbata</i>    | 20-142     | None                                         | N                 |
| 20        | <i>K. ascorbata</i>    | 20-141     | None                                         | N                 |
| 21        | <i>K. ascorbata</i>    | 20-147     | None                                         | N                 |
| 22        | <i>K. ascorbata</i>    | 20-10      | None                                         | N                 |
| 23        | <i>K. ascorbata</i>    | 20-9       | None                                         | N                 |
| 24        | <i>K. ascorbata</i>    | 20-46      | None                                         | N                 |
| 25        | <i>K. ascorbata</i>    | 20-58      | None                                         | N                 |
| 26        | <i>K. ascorbata</i>    | 20-60      | None                                         | N                 |
| 27        | <i>K. ascorbata</i>    | 20-69      | None                                         | N                 |
| 28        | <i>K. ascorbata</i>    | 20-71      | None                                         | N                 |

31 **P**, positive result; p\*, weak positive result; N, negative result

32
